# Supplementary material for: Laboratory confirmation of Buruli ulcer cases in Ghana, 2008-2016
Source: PubMed Central journal article supplement (PMC6003692; doi:10.1371/journal.pntd.0006560), 2018-06-05

# Specimen Collection Form, STOP Buruli Project

## A. Institutional information

Health facility: \_\_\_\_\_

District \_\_\_\_\_

## B. Patient Information

Name of patient: \_\_\_\_\_ Age (yrs): \_\_\_\_\_ Sex:  M  F

Health facility ID: \_\_\_\_\_ Date of Admission: \_\_\_/\_\_\_/\_\_\_

Residential address/Village: \_\_\_\_\_

Sub-district: \_\_\_\_\_

District: \_\_\_\_\_

Occupation: \_\_\_\_\_

Source of drinking water: Tap  Bore hole/well  River/stream  Pond

Classification:  New  Recurrent

Duration of lesion before seeking care: \_\_\_\_\_

History of cases in family/relatives/friends: Yes  No  Specify .....

History of trauma at site of lesion: Yes  No

Use of traditional treatment: Yes  No

BCG vaccination/scar: Yes  No

Pain: Yes  No

## C. Location of lesion:

Upper limb: right  left  Abdomen  Back  Head & neck

Lower limb: right  left  Thorax  Bottucks/ perineals

## D. Clinical form(s):

Nodule(N)  Plaque(Q)  Oedema(E)  Ulcer(U)  Osteomyelitis(O)

Category: \_\_\_\_\_

Date of specimen collection: \_\_\_/\_\_\_/\_\_\_ Type of specimen:  Swab  FNA

Punch biopsy

Biopsy  Blood

## E. Reasons for laboratory request:

New patient  Recurrent case (last SR treatment: date /month \_\_\_/\_\_\_)

Follow up during treatment: \_\_\_\_\_ days of SR treatment

Follow-up after SR treatment: \_\_\_\_\_ weeks of treatment

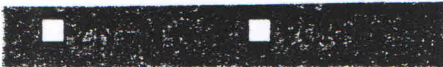

Histopathology

Culture

\_\_\_\_/\_\_\_\_/\_\_\_\_

Date specimen sent to lab request

Name of person making

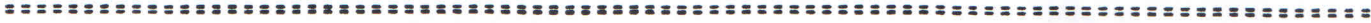

**II. This section should be completed by the laboratory**

Date specimen received in laboratory \_\_\_\_/\_\_\_\_/\_\_\_\_

**Summary Results**

| Examination    | Positive                 | Negative                 | Date           |
|----------------|--------------------------|--------------------------|----------------|
| ZN             | <input type="checkbox"/> | <input type="checkbox"/> | ____/____/____ |
| PCR            | <input type="checkbox"/> | <input type="checkbox"/> | ____/____/____ |
| Histopathology | <input type="checkbox"/> | <input type="checkbox"/> | ____/____/____ |
| Culture        | <input type="checkbox"/> | <input type="checkbox"/> | ____/____/____ |

\_\_\_\_\_

\_\_\_\_/\_\_\_\_/\_\_\_\_

Name of person providing results  
Signature

Date

NMIMR ID #

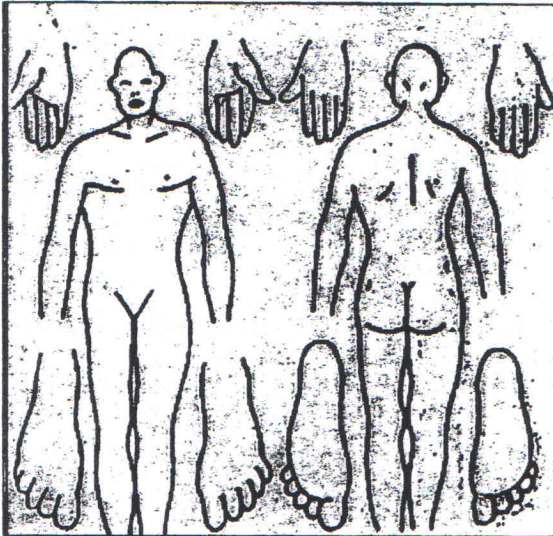

Supplement: pntd.0006560.s003.pdf [file pntd.0006560.s003.pdf]
